# Supplementary material for: NIR‐Triggered Phototherapy and Immunotherapy via an Antigen‐Capturing Nanoplatform for Metastatic Cancer Treatment
Source: PubMed Central journal article supplement (PMC6523374; doi:10.1002/advs.201802157), 2019-03-13
Supplement: ADVS-6-1802157-s001.pdf [file ADVS-6-1802157-s001.pdf]

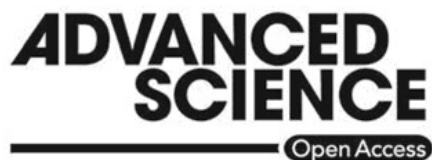

## Supporting Information

for *Adv. Sci.*, DOI: 10.1002/adv.201802157

**NIR-Triggered Phototherapy and Immunotherapy via an Antigen-Capturing Nanoplatfrom for Metastatic Cancer Treatment**

*Meng Wang, Jun Song,\* Feifan Zhou, Ashley R. Hoover, Cynthia Murray, Benqing Zhou, Lu Wang, Junle Qu,\* and Wei R. Chen\**

## Supporting Information

### **NIR-triggered phototherapy and immunotherapy via antigen-capturing nanopatform for metastatic cancer treatment**

Meng Wang, Jun Song,\* Feifan Zhou, Ashley Hoover, Cynthia Murray, Benqing Zhou, Lu Wang, Junle Qu,\* and Wei R. Chen\*

## Supplementary Figures

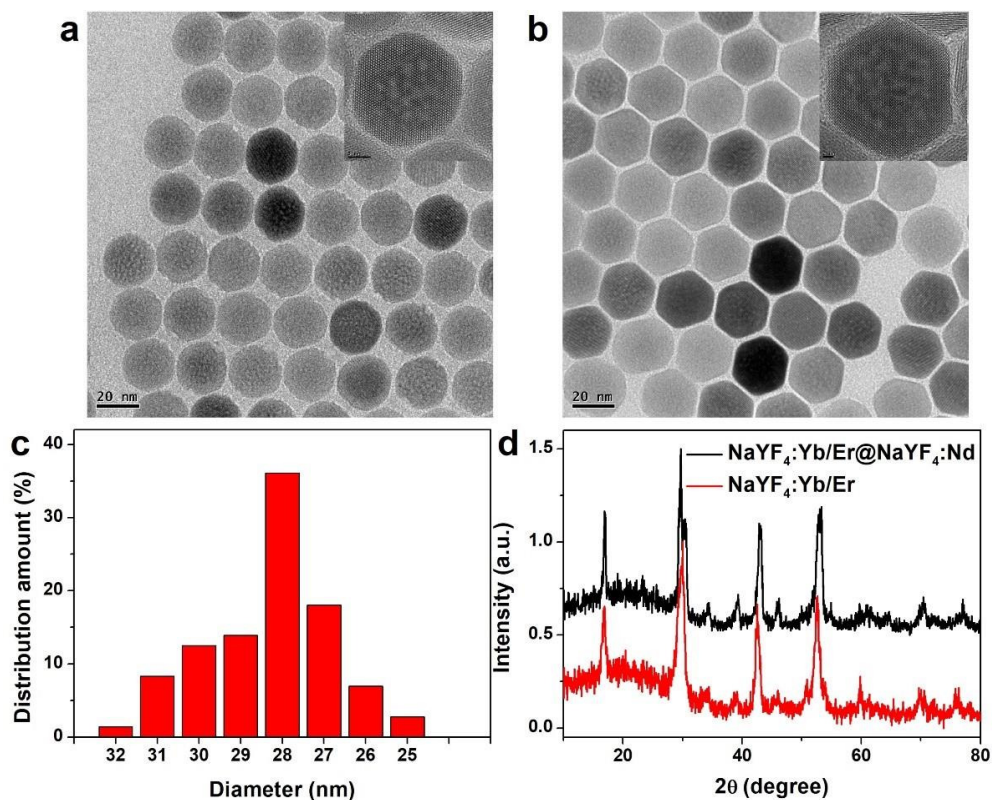

**Figure S1.** Transmission electron microscope (TEM) and High Resolution Transmission Electron Microscope (HRTEM) images of a) oleate-capped NaYF<sub>4</sub>:Yb/Er UCNPs b) oleate-capped NaYF<sub>4</sub>:Yb/Er@NaYF<sub>4</sub>:Nd UCNPs. c) Size distribution of oleate-capped NaYF<sub>4</sub>:Yb,Er/NaYF<sub>4</sub>:Nd UCNPs as determined from 200 particles in the TEM image. d) Powder XRD pattern of NaYF<sub>4</sub>:Yb/Er UCNPs and NaYF<sub>4</sub>:Yb/Er@NaYF<sub>4</sub>:Nd UCNPs.

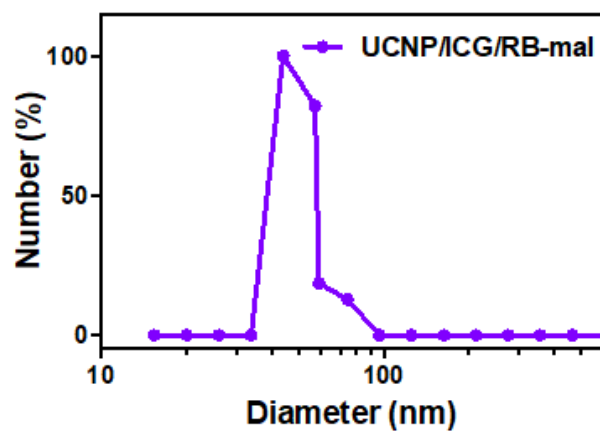

**Figure S2.** Hydrodynamic diameter distribution of UCNP/ICG/RB-mal. The hydrodynamic diameters of UCNP/ICG/RB-mal were determined to be  $41 \pm 1$  nm.

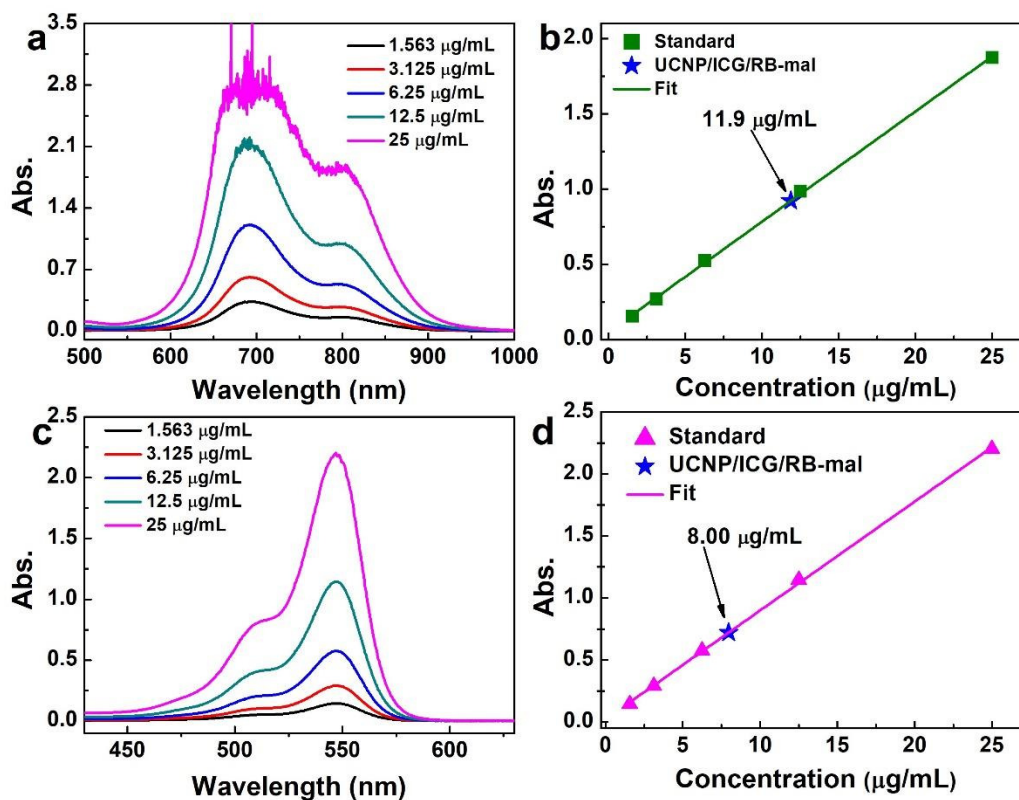

**Figure S3.** Quantitative analysis of indocyanine green (ICG) or rose bengal (RB) loaded in UCNP/ICG/RB-mal. a) Absorption spectra of ICG solution. b) The standard curve of absorption for ICG. The loading amount of ICG was determined to be 1.19% (w / w) in UCNP/ICG/RB-mal. c) Absorption spectra of RB solution. d) The standard curve of absorption for RB. The loading amount of RB was determined to be 0.8% (w / w) in UCNP/ICG/RB-mal.

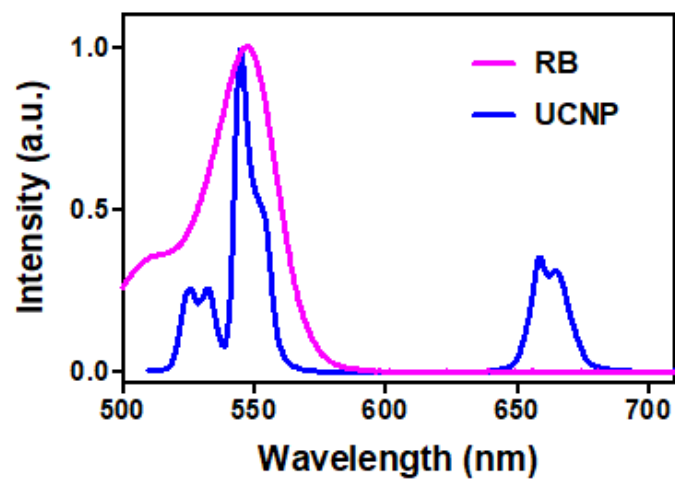

**Figure S4.** Absorption spectra of the RB solution and upconversion luminescence (UCL) spectra of oleate-capped NaYF<sub>4</sub>:Yb/Er@NaYF<sub>4</sub>:Nd nanoparticles, respectively.

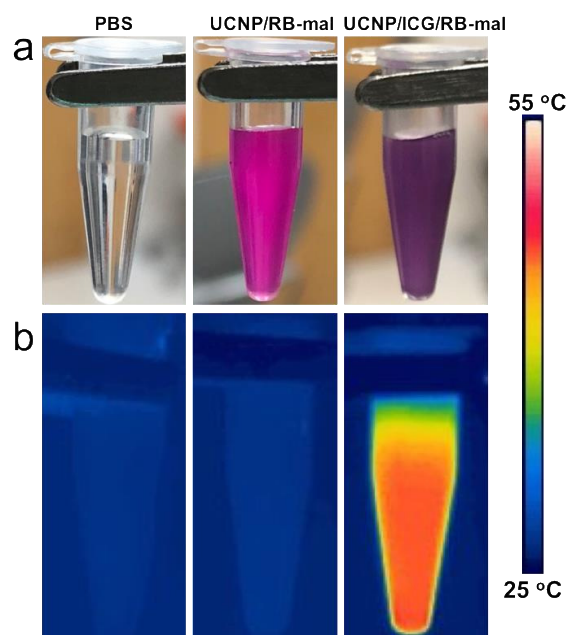

**Figure S5.** Infrared thermal images of PBS, UCNP/RB-mal, and UCNP/ICG/RB-mal solutions upon a 805-nm laser irradiation for 4 min. (0.75 W cm<sup>-2</sup>).

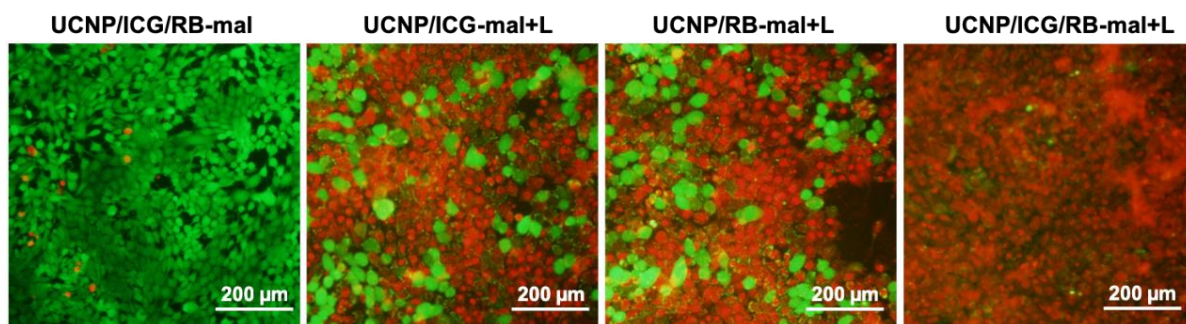

**Figure S6.** Fluorescence images of 4T1 cells after 4 h incubation with UCNP/ICG-mal, UCNP/RB-mal, and UCNP/ICG/RB-mal exposed to a 805-nm laser for 5 min. ( $0.75 \text{ W cm}^{-2}$ ) The cells were con-stained by calcein AM (green, live cells) and propidium iodide (red, dead cells) before imaging. Scale bar: 200  $\mu\text{m}$ .



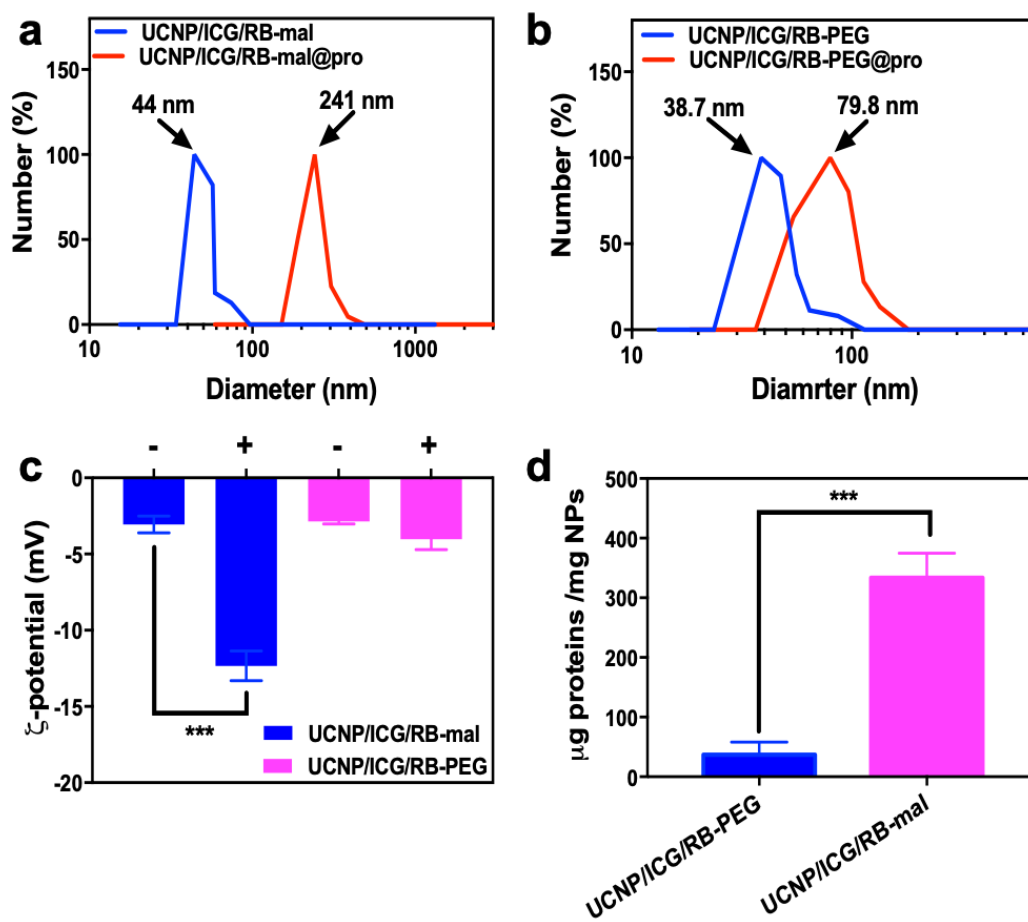

**Figure S7.** The size of a) UCNP/ICG/RB-mal and b) UCNP/ICG/RB-PEG before and after antigen capture. c) The zeta potential of UCNP/ICG/RB-mal or UCNP/ICG/RB-PEG before and after antigen capture. (\*\*\*) $P < 0.001$  d) Quantification of protein captured by nanoparticles. (\*\*\*) $P < 0.001$ ). Data are expressed as means  $\pm$  SD ( $n = 4$ ).

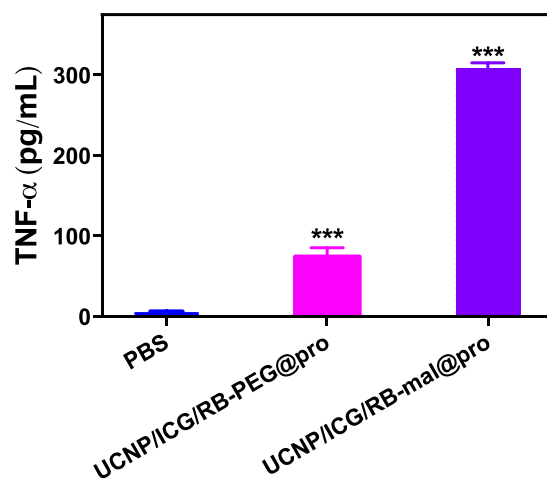

**Figure S8.** Secretion of TNF- $\alpha$  in BMDC suspensions measured by ELISA (<sup>\*\*\*</sup>P < 0.001 vs PBS). Data are expressed as means  $\pm$  SD (n = 4).

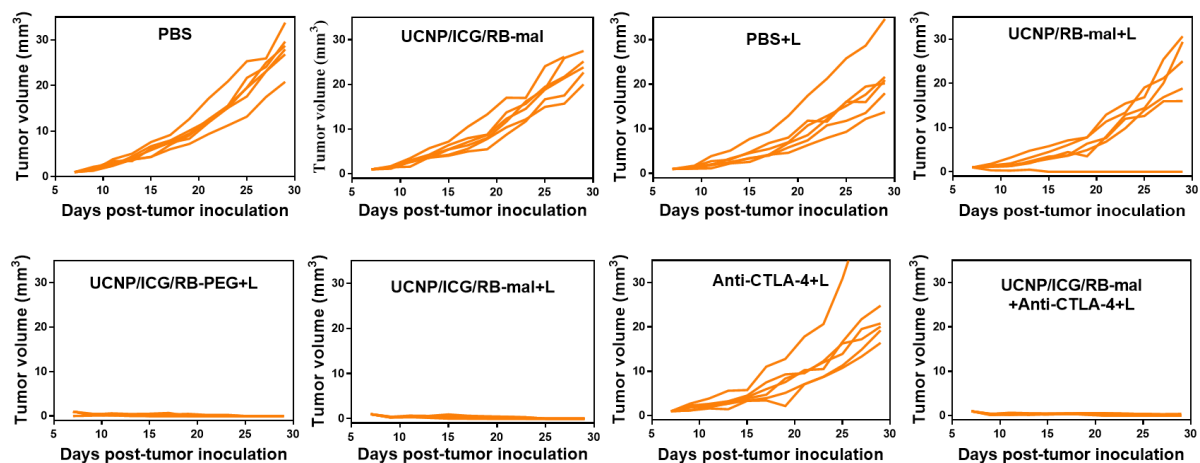

**Figure S9.** Growth curves of tumors in individual mice after various treatments.

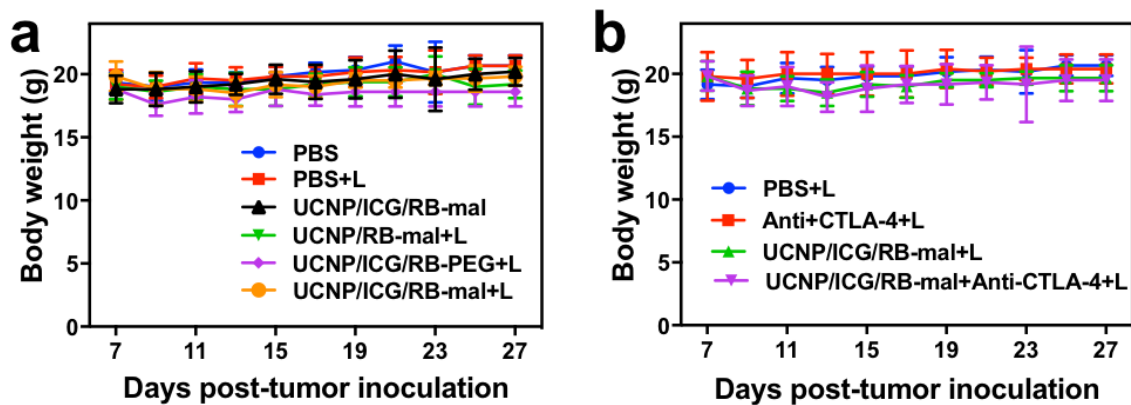

**Figure S10.** Average body weight of orthotopic 4T1 tumor-bearing mice of different groups. Data are expressed as means  $\pm$  SD (n = 6).

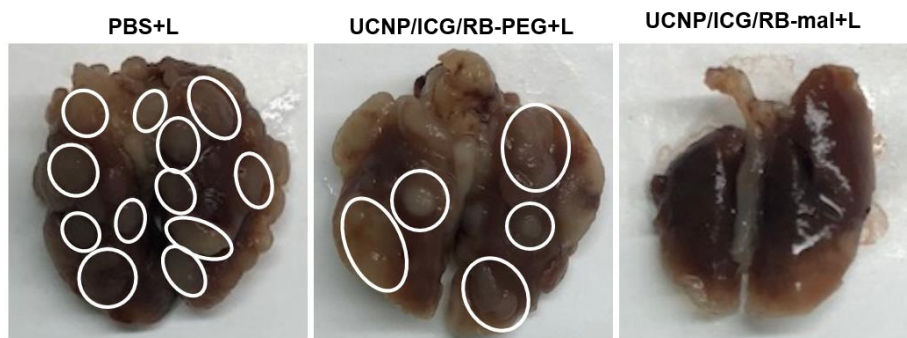

**Figure S11.** Photographs of metastatic nodules in lungs of mice in different groups 25 days after treatment.

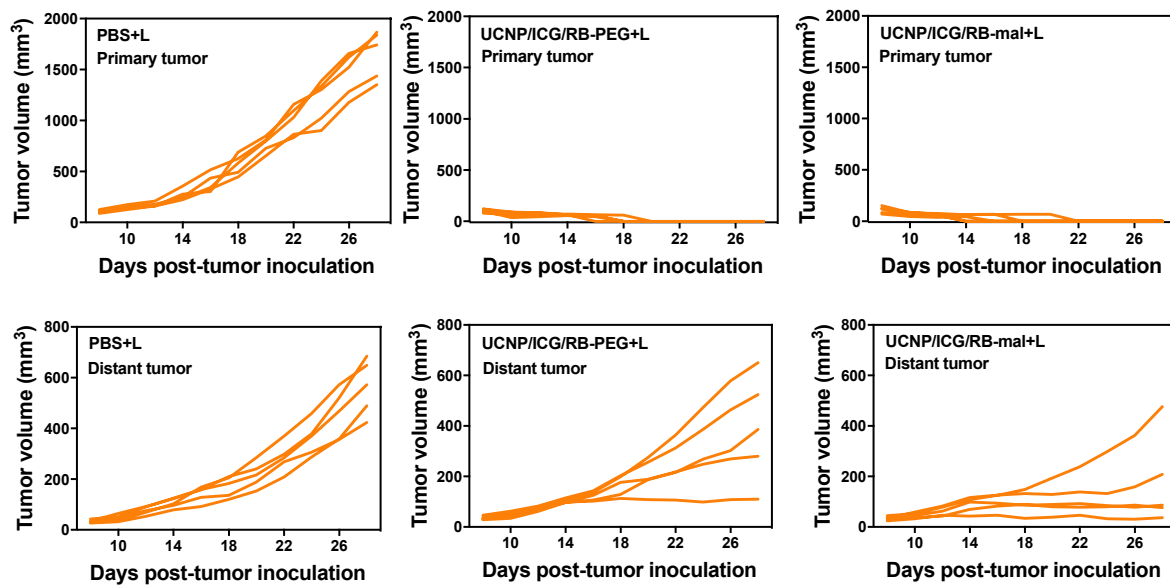

**Figure S12.** Growth curves of primary and distant tumors in individual mice after various treatments.

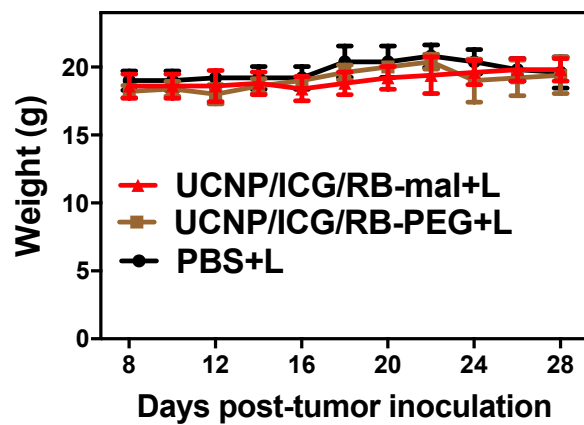

**Figure S13.** Average body weight of bilateral 4T1 tumor-bearing mice of different groups. Data are expressed as means  $\pm$  SD (n = 5).

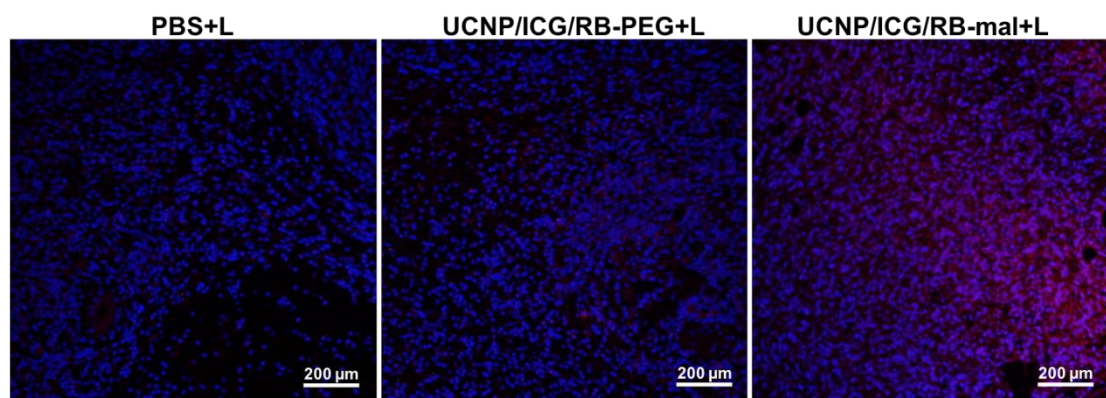

**Figure S14.** Immunohistochemistry staining of CD11c<sup>+</sup> dendritic cells (red) in 4T1 primary tumors 1 day after the treatments. Scale bar = 200 μM.



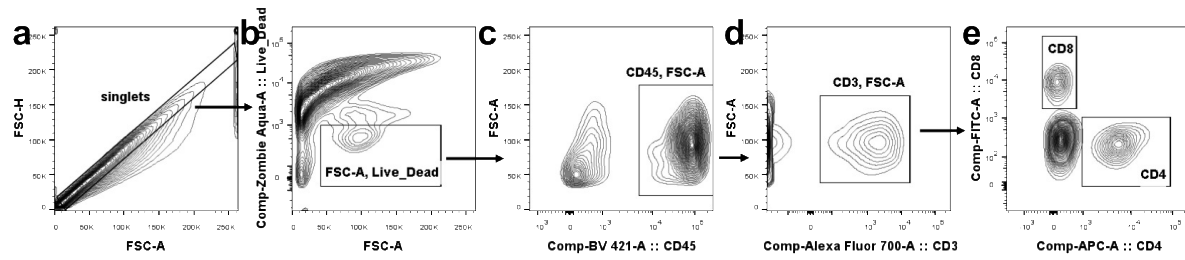

**Figure S15.** Gating strategy determine frequencies of T cells from distant tumors. The gating strategy was performed based on exclusion of doublets by FSC-A and FSC-H a), exclusion of dead cells b), selection of CD45<sup>+</sup> c), selection of CD3<sup>+</sup> d), and further staining using CD8 e) and CD4 e) with appropriate fluorescent dyes to select CD8<sup>+</sup> or CD4<sup>+</sup> T cells, respectively.

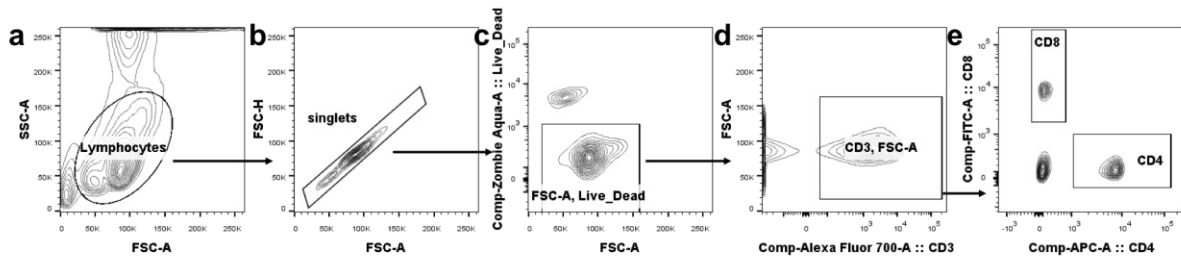

**Figure S16.** Gating strategy determine frequencies of T cells from spleens. The gating strategy was performed based on the right justification of the first gate a), exclusion of doublets by FSC-A and FSC-H b), exclusion of dead cells c), selection of CD3<sup>+</sup> d), and further staining using CD8 e) and CD4 e) with appropriate fluorescent dyes to select CD8<sup>+</sup> or CD4<sup>+</sup> T cells, respectively.

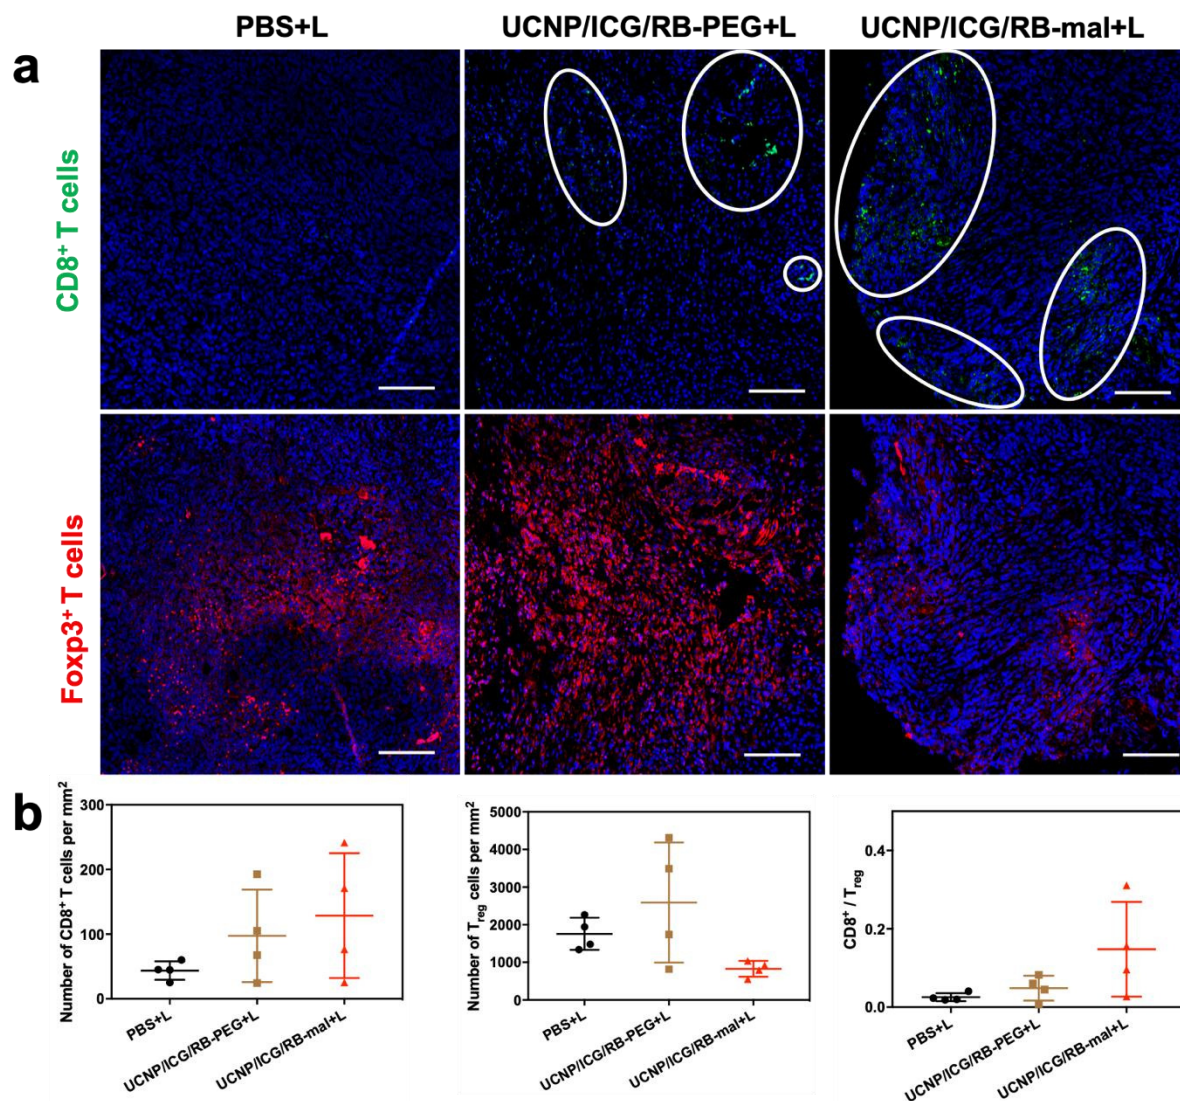

**Figure S17.** T cells immunofluorescence assay. a) Representative images of tumors after staining of CD8<sup>+</sup> T cells (Green) and FoXp3<sup>+</sup> T cells (T<sub>reg</sub>) (Red) in 4T1 untreated second tumors 7 days after the treatments of the primary tumors. Scale bar = 200  $\mu$ M. b) The densities of CD8<sup>+</sup> T cells and T<sub>reg</sub> cells in the tumors. Data are expressed as means  $\pm$  SD (n = 4).

**Table S1. The capture of TDPAs by UCNP/ICG/RB-mal.**

|           | <b>Gene</b> | <b>Description</b>                                     | <b>iBAQ</b> |
|-----------|-------------|--------------------------------------------------------|-------------|
| <b>1</b>  | Hist2h2ab   | Histone H2A type 2-B, PE=1 SV=3                        | 145001.046  |
| <b>2</b>  | Hist2h2ac   | Histone H2A type 2-C, PE=1 SV=3                        | 25180.155   |
| <b>3</b>  | Hist1h4a,   | Histone H4, PE=1 SV=2                                  | 668804.651  |
| <b>4</b>  | Hist1h2bf   | Histone H2B type 1-F/J/L, PE=1 SV=2                    | 1220846.62  |
| <b>5</b>  | Hmgb1       | High mobility group protein, PE=1 SV=4                 | 875.588785  |
| <b>6</b>  | Hspd1       | 60 kDa heat shock protein, PE=1 SV=1                   | 82812.8744  |
| <b>7</b>  | Hsph1       | Heat shock protein 105 kDa, PE=1 SV=2                  | 5658.95921  |
| <b>8</b>  | Hsp90ab1    | Heat shock protein HSP 90-beta, PE=1 SV=3              | 21224.0829  |
| <b>9</b>  | Hspa1b      | Heat shock 70 kDa protein 1B, PE=1 SV=3                | 6718.14642  |
| <b>10</b> | Hspa8       | Heat shock cognate 71 kDa protein, PE=1 SV=1           | 109807.119  |
| <b>11</b> | Hspa4l      | Heat shock 70 kDa protein 4L, PE=1 SV=2                | 349.673031  |
| <b>12</b> | Hsp90aa1    | Heat shock protein HSP 90-alpha, PE=1 SV=4             | 15045.1419  |
| <b>13</b> | Hsp90ab1    | Heat shock protein HSP 90-beta, PE=1 SV=3              | 21224.0829  |
| <b>14</b> | Hspd1       | 60 kDa heat shock protein, PE=1 SV=1                   | 82812.8744  |
| <b>15</b> | Trap1       | Heat shock protein 75 kDa, PE=1 SV=1                   | 43148.83    |
| <b>16</b> | Hspa4       | Heat shock 70 kDa protein 4, PE=1 SV=1                 | 12998.5256  |
| <b>17</b> | Hspd1       | 60 kDa heat shock protein, PE=1 SV=1                   | 2155.54439  |
| <b>18</b> | Mthfd1      | C-1-tetrahydrofolate synthase, PE=1 SV=4               | 36050.4115  |
| <b>19</b> | Mthfd11     | Monofunctional C1-tetrahydrofolate synthase, PE=1 SV=2 | 2155.54439  |
| <b>20</b> | Mthfd1      | C-1-tetrahydrofolate synthase, PE=1 SV=4               | 6686.73136  |
| <b>21</b> | Actn4       | Alpha-actinin-4, PE=1 SV=1                             | 26667.0449  |
